# Supplementary material
Source: PubMed Central journal article supplement (PMC5868416)
Supplement: NIHMS938020-supplement-supplement_1.pdf [file NIHMS938020-supplement-supplement_1.pdf]

## **Supplement 1**

A recent CDC report and associated Viewpoint article reported on the increase in obesity and overweight associated cancers, such that in 2014, approximately 631,000 persons in the United States were diagnosed with a cancer associated with overweight and obesity, accounting for 55% of new cancers in women and 24% in men. Importantly, providing further support for our proposal, there was a significant increase of obesity associated cancers in persons aged 20-49 years and 50-64 years, while there was a decrease in those older than age 65. The Viewpoint article further stressed the need for “intensive multicomponent behavioral intervention programs to help patients with obesity lose weight ... to prevent diseases associated with obesity” and by implication, contribute to prevention of cancers.

Steele CB, Thomas CC, Henley SJ, et al. Vital Signs: Trends in Incidence of Cancers Associated with Overweight and Obesity – United States 2005-2014. CDC. MMWR Morb Mortal Wkly Rep 2017; 66:1052-1058.

Masseti GM, Dietz WH, Richardson LC. Excessive Weight Gain, Obesity, and Cancer; Opportunities for Clinical Intervention – JAMA November 28,2017, Vol. 318, Num 20:1975-1976.
